# Efficiency of *Leptotrombidium* Chiggers (Acari: Trombiculidae) at Transmitting *Orientia tsutsugamushi* to Laboratory Mice

KRIANGKRAI LERDTHUSNEE, NITTAYA KHLAIMANEE, TAWEESEK MONKANNA,  
NOPPADON SANGJUN,<sup>1</sup> SIRIPORN MUNGVIPIYA, KENNETH J. LINTHICUM,<sup>2</sup>  
STEPHEN P. FRANCES,<sup>3</sup> THOMAS M. KOLLARS, JR.,<sup>4</sup> AND RUSSELL E. COLEMAN<sup>5</sup>

Department of Entomology, U.S. Army Medical Component, Armed Forces Research Institute of Medical Sciences, Bangkok, Thailand

J. Med. Entomol. 39(3): 521–525 (2002)

**ABSTRACT** Thirteen different laboratory colonies of *Leptotrombidium* chiggers [*L. chiangraiensis* Tanskul & Linthicum, *L. deliense* Walch and *L. imphalum* (Vercammen-Grandjean & Langston)] were evaluated for their ability to transmit *Orientia tsutsugamushi* (Hyashi) to mice. Of 4,372 transmission attempts using individual chiggers from all 13 colonies, 75% ( $n = 3,275$ ) successfully infected mice. Transmission rates for the individual chigger colonies ranged from 7 to 80%. Increasing the number of chiggers that fed on a given mouse generally increased transmission rates. Transmission of *O. tsutsugamushi* to mice by different generations (F1–F11) of certain chigger colonies was stable; however, transmission rates varied greatly in other colonies. Transmission rates (both vertical and horizontal) of several *L. chiangraiensis* colonies and the *L. deliense* colony were the highest, suggesting that these colonies may be useful for the development of a chigger-challenge model that can be used to evaluate the efficacy of candidate scrub typhus vaccines or therapeutic agents in laboratory mice.

**KEY WORDS** *Leptotrombidium chiangraiensis*, *Leptotrombidium deliense*, *Leptotrombidium imphalum*, *Orientia tsutsugamushi*, chiggers, transmission

SCRUB TYPHUS is an acute febrile zoonotic disease resulting from infection with the gram-negative, intracellular bacteria *Orientia* (formerly *Rickettsia*) *tsutsugamushi* (Hyashi) (Tamura et al. 1995, Pradutkanchana et al. 1997). The disease is endemic in southeast Asia where it can account for 10–19% of patients admitted to hospitals with acute pyrexia of uncertain origin (Jatinandana 1971, Brown et al. 1984). Approximately 1 million cases occur each year and more than a billion people are at risk worldwide (Rosenberg 1997, Watt et al. 2000). Clinical manifestations of scrub typhus range from mild fever with few other symptoms to a fatal syndrome characterized by multiple-organ failure. Treatment with chloramphenicol or one of the tetracycline antibiotics typically results in rapid and com-

plete recovery (Wisseman 1991). Scrub typhus is transmitted by several species of larval trombiculid mites, which are commonly known as chiggers (Tanskul et al. 1998). Because chiggers feed only once on a vertebrate host, transovarial transmission is thought to be the mechanism for maintenance of *O. tsutsugamushi* in the vector (Walker et al. 1975, Takahashi et al. 1994). Frances et al. (2000) demonstrated that *O. tsutsugamushi* could be transmitted to co-feeding mites and Takahashi et al. (1990) were able to infect chiggers fed on wild rodents; these observations suggested that transovarial transmission is not the sole method for maintenance of *O. tsutsugamushi* in vector populations. Traub et al. (1975) documented the first and only occurrence of horizontal transmission of *O. tsutsugamushi*.

Research on scrub typhus dwindled following the discovery that antibiotics rapidly cured scrub typhus (Rosenberg 1997). However, Watt et al. (1996) reported a form of scrub typhus in northern Thailand that responds poorly to conventional antibiotic therapy; subsequent in vitro and in vivo studies have supported this finding (Strickman et al. 1995, Watt et al. 1999). The presence of putative antibiotic-resistant strains of *O. tsutsugamushi* has led to a renewed interest in the identification of therapeutic agents that can be used to treat resistant strains (Watt et al. 1999). In addition, the U.S. military and the Republic of

In conducting the research described in this report, the investigators adhered to the "Guide for the Care and Use of Laboratory Animals" as promulgated by the Committee on Care and Use of Laboratory Animals of the Institute of Laboratory Animal Resources, National Research Council. The facilities are fully accredited by the American Association of Laboratory Animal Care.

<sup>1</sup> Department of Laboratory Animals, Division of Research, Royal Thai Army, Armed Forces Research Institute of Medical Sciences, Bangkok, Thailand.

<sup>2</sup> Walter Reed Army Institute of Research, Silver Spring, MD 20910.

<sup>3</sup> Australian Army Malaria Institute, Gallipoli Barracks, Enoggera, Queensland, Australia.

<sup>4</sup> Entomological Sciences Program, U.S. Army Center for Health Promotion and Preventive Medicine, Aberdeen, MD.

<sup>5</sup> E-mail: colemanre@thai.amedd.army.mil.

Korea have separate efforts to develop a scrub typhus vaccine.

One of the goals of the Armed Forces Research Institute of Medical Sciences (AFRIMS) in Bangkok, Thailand, is to develop a chigger-challenge animal model with which to evaluate the efficacy of candidate scrub typhus vaccines or therapeutic compounds. A total of 15 *O. tsutsugamushi*-infected chigger colonies is maintained at AFRIMS, including seven colonies of *L. imphalum* (Vercammen-Grandjean & Langston) (Li-1 to Li-7), five colonies of *L. chiangraiensis* Tanskul & Linthicum (Lc-1 to Lc-5), two colonies of *L. fletcheri* (Womersley & Heaslip) (Lf-1 and Lf-2), and a colony of *L. deliense* Walch (Ld-1). The goal of the study reported here was to evaluate the ability of mites from each colony (except *L. fletcheri*) to transmit *O. tsutsugamushi*.

### Materials and Methods

**Establishment of Chigger Colonies.** Rodents were routinely collected during studies on the epidemiology of scrub typhus in Chiangrai (Tanskul and Linthicum 1997, 1999; Tanskul et al. 1998) and Nonthaburi (Tanskul et al. 1994, Frances et al. 1999) provinces in Thailand. Chiggers collected from the rodents were maintained individually until it was determined if the host rodent was infected with *O. tsutsugamushi*. Once a rodent was confirmed as *O. tsutsugamushi* positive, chiggers collected from that rodent were reared individually and used to establish colonies (Tanskul et al. 1998). Samples of larvae of the F1 and subsequent generations were tested for the presence of *O. tsutsugamushi* to establish transovarial and filial infection rates. The seven *L. imphalum* and five *L. chiangraiensis* colonies originated from specimens collected in Chiangrai Province in northern Thailand, whereas the *L. deliense* colony originated from Nonthaburi Province in central Thailand. All procedures involving animals were approved by the AFRIMS Institutional Animal Care and Use Committee (IACUC).

**Laboratory Transmission from Chiggers to Mice.** Chiggers from a given colony were placed individually or in pools of 2–50 on the ear of an anesthetized *O. tsutsugamushi*-naïve ICR mouse. The mouse was placed in a restraining cage (10 cm long by 3 cm diameter) to prevent self-grooming. Food was provided ad libitum. The restraining cage was placed over a pan of water to prevent escape of infected chiggers. Mice were held in the restraining cages for 3–4 d, then anesthetized, removed from the restraining cage, and all chiggers removed from each mouse by hand. The mouse was then placed in a polycarbonate cage and checked daily for 30 d for signs and symptoms (rough coat, inactivity, inappetence) of *O. tsutsugamushi* infection. Ill mice were euthanized and peritoneal scrapings examined microscopically for the presence of *O. tsutsugamushi* by Giemsa stain and direct-fluorescent antibody technique (Roberts et al. 1975). Mice that did not develop clinical scrub typhus at the end of the 30 d observation period were euthanized and their sera evaluated for *O. tsutsugamushi* antibody

using an indirect immunoperoxidase test (Tanskul et al. 1998). The determination of transmission of *O. tsutsugamushi* by chiggers was based on either the detection of *O. tsutsugamushi* in mouse peritoneal scrapings or presence of specific antibody against *O. tsutsugamushi*.

**Effect of Chigger Generation on *O. tsutsugamushi* Transmission to Mice.** The 13 colonies of *O. tsutsugamushi*-infected chiggers evaluated in this study have been maintained at AFRIMS for from 3 to 11 generations. Transmission rates of *O. tsutsugamushi* by different generations of 12 of the colonies of *Leptotrombidium* chiggers were determined using the procedures described above.

**Statistics.** We used chi-square analysis to determine if the number of mice infected with *O. tsutsugamushi* by a given colony of chiggers was significantly different from the number of mice infected by chiggers from all of the colonies. Chi-square analysis with Bonferroni adjustment and Fisher exact test with Bonferroni adjustment (where  $n < 8$ ) were used to analyze generational differences and colony line differences within a species.

### Results

*Orientia tsutsugamushi* transmission rates for individual chiggers from each of the 13 colonies are provided in Table 1; 74.9% ( $n = 3,275$ ) of the 4,371 transmission attempts using chiggers from all 13 colonies successfully infected mice. Transmission rates in colonies Li-1, Li-3, Li-4, and Li-7 were not significantly different from transmission rates of all colonies. Transmission rates in colonies Ld-1, Lc-1, Lc-2, Lc-5, and Li-2 were significantly ( $\chi^2$  test,  $P < 0.05$ ) higher than rates with all colonies, while rates in colonies Lc-3, Lc-4, Li-5 and Li-6 were significantly lower (Table 1).

The effect of the number of chiggers placed on the host on *O. tsutsugamushi* transmission rates is shown in Table 2. A total of 225 feeds was conducted with two or more chiggers. In general, increasing the number of chiggers fed on a mouse increased transmission rates; however, in some instances increasing the number of chiggers actually yielded lower transmission rates (Table 2).

Transmission rates for different generations of 12 of the *Leptotrombidium* chigger colonies are provided in Table 3. Transmission rates for each of these colonies were never identical from one generation to the next; however, certain colonies (Lc-1, Lc-2, Lc-5, Ld-1, and Li-7) had transmission rates that remained relatively stable from generation to generation (Table 3). In contrast, colonies Lc-4, Li-1, Li-2, Li-3, and Li-4 had transmission rates that differed significantly ( $\chi^2$  test with Bonferroni adjustment and Fisher exact test with Bonferroni adjustment,  $P < 0.05$ ) from one generation to the next (Table 3).

### Discussion

Pathogenicity of *O. tsutsugamushi* for laboratory mice is influenced by at least three factors: route of

Table 1. Transmission efficacy of 13 colonies of *Leptotrombidium* chiggers for *O. tsutsugamushi*

| Species/colony           | No. of mice | No. uninfected (%) | No. infected (%) | X <sup>2</sup>      |
|--------------------------|-------------|--------------------|------------------|---------------------|
| <i>L. deliense</i>       |             |                    |                  |                     |
| Ld-1                     | 314         | 40 (12.7)          | 274 (87.3)       | 24.33 <sup>a</sup>  |
| <i>L. chiangraiensis</i> |             |                    |                  |                     |
| Lc-1                     | 386         | 54 (14.0)          | 332 (86.0)       | 23.89 <sup>a</sup>  |
| Lc-2                     | 413         | 48 (11.6)          | 365 (88.4)       | 37.61 <sup>a</sup>  |
| Lc-3                     | 69          | 64 (92.8)          | 5 (7.2)          | 161.06 <sup>a</sup> |
| Lc-4                     | 494         | 182 (36.8)         | 312 (63.2)       | 31.63 <sup>a</sup>  |
| Lc-5                     | 148         | 17 (11.5)          | 131 (88.5)       | 14.27 <sup>a</sup>  |
| Total                    | 1,510       | 365 (24.2)         | 1,145 (75.8)     | 0.64                |
| <i>L. imphalum</i>       |             |                    |                  |                     |
| Li-1                     | 271         | 69 (25.4)          | 202 (74.5)       | 0.02                |
| Li-2                     | 264         | 47 (17.8)          | 217 (82.2)       | 7.12 <sup>a</sup>   |
| Li-3                     | 282         | 67 (23.8)          | 215 (76.2)       | 0.25                |
| Li-4                     | 750         | 197 (26.3)         | 553 (73.7)       | 0.47                |
| Li-5                     | 310         | 133 (42.9)         | 177 (57.1)       | 47.41 <sup>a</sup>  |
| Li-6                     | 300         | 95 (31.7)          | 205 (68.3)       | 6.39 <sup>a</sup>   |
| Li-7                     | 371         | 84 (32.4)          | 287 (77.6)       | 1.10                |
| Total                    | 2,548       | 692 (27.1)         | 1,856 (72.9)     | 3.19                |
| Grand total              | 4,372       | 1,097 (25.1)       | 3,275 (74.9)     | Reference           |

Individual chiggers from each infected colony were fed on individual mice and mouse infection rates determined.  
<sup>a</sup> Transmission rates for the given chigger colony are significantly ( $P < 0.05$ ) different from the transmission rates of all colonies.

inoculation, antigenic strain, and natural resistance of the host (Groves and Kelly 1989). In contrast to other hematophagous arthropods such as mosquitoes, fleas and lice, chiggers do not normally ingest blood (Traub and Wisseman 1968). Following attachment to the vertebrate host, chiggers inject a digestive fluid that causes disintegration of cellular contents. Chiggers feed upon serum exudates and the products of cell lysis at the site of attachment (Traub and Wisseman 1968, Traub et al. 1975). Although the exact mechanism by which chiggers inoculate *O. tsutsugamushi* has not been documented, we assume that the pathogen is inoculated into the extra-cellular fluid rather than directly into the blood.

Although the role of chigger saliva on *O. tsutsugamushi* transmission has not been evaluated, the wealth of data from other vector/pathogen systems suggests that chigger transmission of *O. tsutsugamushi* may be significantly different than intravenous inoculation. These data suggest that chigger-challenge may be the best way to test infection of experimental animals with

*O. tsutsugamushi*. In one of the few studies assessing transmission of scrub typhus to humans using laboratory-infected chiggers, Shirai et al. (1982b) suggested that vector-transmitted *O. tsutsugamushi* infection was the preferable method of assessing protection from scrub typhus.

In this study, efficiency of transmission of *O. tsutsugamushi* varied among the 13 colonies of infected chiggers, with rates ranging from 7 to 88%. Recently, Frances et al. (2001) reported that two lines of *L. deliense* varied in their ability to transmit *O. tsutsugamushi* to mice, with F1 and F2 generations transmitting the parasite less efficiently than did the parental generation. Tanskul et al. (1998) reported that 100% of naive mice became infected following infestation by *O. tsutsugamushi*-infected *L. chiangraiensis* and *L. imphalum*. Significantly lower infection rates were reported by Rapmund et al. (1972), who found that 7% (3/42) of *L. arenicola* Traub transmitted *O. tsutsugamushi* to mice, with similar rates reported for *L. fletcheri* (reported as *L. akamushi*) (Rapmund et al. 1969).

Table 2. Effect of the number of *Leptotrombidium* chiggers placed on each mouse on transmission of *O. tsutsugamushi*

| Chigger species (colony) | No. of mice infected/Total mice (% positive) |             |            |           |            |             |             |
|--------------------------|----------------------------------------------|-------------|------------|-----------|------------|-------------|-------------|
|                          | No. of chiggers placed on each mouse         |             |            |           |            |             |             |
|                          | 1                                            | 2           | 3          | 5         | 10         | 20          | 30          |
| <i>L. chiangraiensis</i> |                                              |             |            |           |            |             |             |
| Lc-1                     | 332/386 (86)                                 | 15/17 (88)  |            |           | 5/5 (100)  |             |             |
| Lc-4                     | 312/494 (63)                                 | 16/17 (94)  |            | 9/12 (75) |            |             |             |
| <i>L. deliense</i>       |                                              |             |            |           |            |             |             |
| Ld-1                     | 274/314 (87)                                 | 12/14 (86)  | 10/12 (83) |           |            | 14/14 (100) | 17/17 (100) |
| <i>L. imphalum</i>       |                                              |             |            |           |            |             |             |
| Li-4                     | 553/750 (74)                                 | 35/43 (81)  |            |           | 3/7 (43)   | 3/10 (30)   | 12/13 (92)  |
| Li-5                     | 177/310 (57)                                 | 15/18 (83)  | 4/6 (67)   |           |            | 3/5 (60)    |             |
| Li-6                     | 205/300 (68)                                 | 4/9 (44)    |            |           |            |             |             |
| Li-7                     | 287/371 (78)                                 |             |            |           | 6/6 (100)  |             |             |
| Total                    | 2140/2925 (73)                               | 97/118 (82) | 14/18 (78) | 9/12 (75) | 14/18 (78) | 20/29 (69)  | 17/17 (100) |

We only include transmission rates where a given number of chiggers from a given colony fed on a minimum of five mice.

Table 3. Transmission of *O. tsutsugamushi* by different generations of 12 colonies of *Leptotrombidium* chiggers.

| Generation | No. of mice infected/Total mice (% positive) |               |               |              |              |              |              |  |  |  |  |
|------------|----------------------------------------------|---------------|---------------|--------------|--------------|--------------|--------------|--|--|--|--|
|            | Chigger colony                               |               |               |              |              |              |              |  |  |  |  |
|            | Li-1                                         | Li-2          | Li-3          | Li-4         | Li-5         | Li-6         | Li-7         |  |  |  |  |
| 1          |                                              |               |               |              | 7/10 (70)ab  |              |              |  |  |  |  |
| 2          | 34/35 (97)a                                  | 8/10 (80)a    | 13/24 (54)b   | 10/10 (100)a |              | 44/74 (59)a  | 79/114 (69)a |  |  |  |  |
| 3          | 25/30 (83)ab                                 | 76/78 (97)a   | 37/176 (21)c  | 30/35 (86)a  |              | 72/104 (69)a | 97/118 (82)a |  |  |  |  |
| 4          |                                              | 190/221 (85)a | 181/189 (96)a | 55/63 (87)a  |              | 39/61 (64)a  | 39/52 (75)a  |  |  |  |  |
| 5          | 47/67 (70)b                                  | 53/60 (88)a   | 48/52 (92)a   | 26/28 (93)a  |              | 40/43 (93)b  | 52/62 (84)a  |  |  |  |  |
| 6          | 133/148 (90)a                                | 15/18 (83)a   |               |              |              |              |              |  |  |  |  |
| 7          | 56/64 (88)ab                                 | 3/4 (75)a     |               |              |              |              |              |  |  |  |  |
| 8          | 11/12 (92)ab                                 |               |               |              |              |              |              |  |  |  |  |
| 9          |                                              |               |               |              |              |              |              |  |  |  |  |
| 10         |                                              |               |               |              |              |              |              |  |  |  |  |
| 11         |                                              |               |               |              |              |              |              |  |  |  |  |
| Total      | 306/356 (86)                                 | 345/391 (88)  | 279/162 (63)  | 121/136 (89) | 146/270 (54) | 195/283 (69) | 270/349 (77) |  |  |  |  |

Chiggers from a given generation were individually fed on mice and transmission rates determined. Values followed by a different letter are significantly different ( $\chi^2$  with Bonferroni adjustment when  $n \geq 8$  and Fisher's exact test with Bonferroni adjustment when  $n < 8$ ;  $P < 0.05$ ).

In contrast, Shirai et al. (1982a) found that 85–99% of mice fed on by individual *L. arenicola* or *L. fletcheri* became infected. Shirai et al. (1982b) reported on the successful infection of three human volunteers using laboratory colonies of *L. fletcheri* and *L. arenicola*. Since chigger transmission of *O. tsutsugamushi* to mice can be efficient (Shirai et al. 1982a, 1982b; Tanskul et al. 1998), transmission rates obtained using individual chiggers may reflect actual chigger infection rates. Although we did not assess chigger infection rates or efficiency of transovarial transmission in any of the 13 colonies, Tanskul et al. (1998) reported transovarial transmission rates of 93–100% in parental and F1 generations of *L. chiangraiensis* and *L. imphalum*. Similar transovarial transmission rates have been reported for other species (Rapmund et al. 1969, 1972; Traub and Wisseman 1968; Roberts and Robinson 1977; Takahashi et al. 1988). Our results show that transmission rates by different generations of chiggers are stable (colonies Lc-1, Lc-2, and Lc-5) or can vary (colonies Lc-4 and Li-3). Kollars et al. (2001) showed *O. tsutsugamushi* infection rates in eggs produced by individual chiggers from *L. imphalum* colonies Li-1 thru Li-7 ranged from 8 to 45%. These rates are significantly lower than our results would suggest. Clearly, it will be necessary to evaluate both vertical and horizontal transmission rates to determine whether the variation in chigger to mouse transmission we observed reflects actual chigger infection rates or results from variation in transmission efficiency.

Acknowledgments

Funding for this project was provided by the Military Infectious Diseases Research Program of the U.S. Army Medical Research and Materiel Command, Fort Detrick, MD.

References Cited

Brown, G. W., A. Shirai, M. Jegathessan, D. S. Burke, J. C. Twartz, J. P. Saunders, and D. L. Huxsoll. 1984. Febrile illnesses in Malaysia: an analysis of 1,629 hospitalized patients. *Am. J. Trop. Med. Hyg.* 33: 311–315.

Frances, S. P., P. Watcharapichat, D. Phulsuksombati, P. Tanskul, and K. J. Linthicum. 1999. Seasonal occurrence of *Leptotrombidium deliense* (Acari: Trombiculidae) attached to sentinel rodents in an orchard near Bangkok, Thailand. *J. Med. Entomol.* 36: 869–874.

Frances, S. P., P. Watcharapichat, D. Phulsuksombati, and P. Tanskul. 2000. Transmission of *Orientia tsutsugamushi*, the aetiological agent for scrub typhus, to co-feeding mites. *Parasitology* 120: 601–607.

Frances, S. P., P. Watcharapichat, and D. Phulsuksombati. 2001. Vertical transmission of *Orientia tsutsugamushi* in two lines of naturally infected *Leptotrombidium deliense* (Acari: Trombiculidae). *J. Med. Entomol.* 38: 17–21.

Groves M. G., and D. J. Kelly. 1989. Characterization of factors determining *Rickettsia tsutsugamushi* pathogenicity for mice. *Infect. Immunol.* 57: 1476–1482.

Jatinandana, S. 1971. A study of fever of unknown origin in Northeast Thailand, pp 37–39. *In* Report of the First International Seminar of the SEATO Medical Research Laboratory, Bangkok, Thailand.



- Kollars, T. M., Jr., A. Kengluetcha, N. Khlaimeanee, and P. Tanskul. 2001. Temporal changes in prevalence of scrub typhus rickettsia (*Orientia tsutsugamushi*) infecting the eggs of *Leptotrombidium imphalum* (Acari: Trombiculidae). *J. Med. Entomol.* 38: 108–110.
- Pradutkanchana, J., K. Silpapojakul, H. Paxton, S. Pradutkanchana, D. J. Kelly, and D. Strickman. 1997. Comparative evaluation of four serodiagnostic tests for scrub typhus in Thailand. *Trans. R. Soc. Trop. Med. Hyg.* 91: 425–428.
- Rapmund G., R. W. Upham, Jr., W. D. Kundin, C. Manikumar, and T. C. Chan. 1969. Transovarian development of scrub typhus rickettsiae in a colony of vector mites. *Trans. R. Soc. Trop. Med. Hyg.* 63: 251–258.
- Rapmund G., A. L. Dohany, C. Manikumar, and T. C. Chan. 1972. Transovarial transmission of *Rickettsia tsutsugamushi* in *Leptotrombidium* (*Leptotrombidium*) *arenicola* Traub (Acarina Trombiculidae). *J. Med. Entomol.* 9: 71–72.
- Roberts L. W., and D. M. Robinson. 1977. Efficiency of transovarial transmission of *Rickettsia tsutsugamushi* in *Leptotrombidium arenicola* (Acari: Trombiculidae). *J. Med. Entomol.* 13: 493–496.
- Roberts L. W., D. M. Robinson, G. Rapmund, J. S. Walker, E. Gan, and S. Ram. 1975. Distribution of *Rickettsia tsutsugamushi* in organs of *Leptotrombidium* (*Leptotrombidium*) *fletcheri* (Prostigmata: Trombiculidae). *J. Med. Entomol.* 12: 345–348.
- Rosenberg, R. 1997. Drug-resistant scrub typhus: paradigm and paradox. *Parasitol. Today* 13: 131–132.
- Shirai A., D. L. Huxsoll, A. L. Dohany, R. D. Montrey, R. M. Werner, and E. Gan. 1982a. Characterization of *Rickettsia tsutsugamushi* strains in two species of naturally infected, laboratory-reared chiggers. *Am. J. Trop. Med. Hyg.* 31: 395–402.
- Shirai A., J. P. Saunders, A. L. Dohany, D. L. Huxsoll, and M. G. Groves. 1982b. Transmission of scrub typhus to human volunteers by laboratory-reared chiggers. *Jpn. J. Med. Sci. Biol.* 35: 9–16.
- Strickman D., T. Sheer, K. Salata, J. Hershey, G. Dasch, D. Kelly, and R. Kuschner. 1995. In vitro effectiveness of azithromycin against doxycycline-resistant and -susceptible strains of *Rickettsia tsutsugamushi*, etiologic agent of scrub typhus. *Antimicrob. Agents Chemother.* 39: 2406–2410.
- Takahashi M., M. Murata, S. Nogami, E. Hori, A. Kawamura, Jr., and H. Tanaka. 1988. Transovarial transmission of *Rickettsia tsutsugamushi* in *Leptotrombidium pallidum* successively reared in the laboratory. *Jpn. J. Exp. Med.* 58: 213–218.
- Takahashi, M., M. Murata, E. Hori, H. Tanaka, and A. Kawamura, Jr. 1990. Transmission of *Rickettsia tsutsugamushi* from *Apodemus speciosus*, a wild rodent, to larval trombiculid mites during the feeding process. *Jpn. J. Exp. Med.* 60: 203–208.
- Takahashi, M., M. Murata, H. Misumi, E. Hori, A. Kawamura, Jr., and H. Tanaka. 1994. Failed vertical transmission of *Rickettsia tsutsugamushi* (Rickettsiales: Rickettsiaceae) acquired from rickettsemic mice by *Leptotrombidium pallidum* (Acari: Trombiculidae). *J. Med. Entomol.* 31: 212–216.
- Tamura, A., N. Ohashi, H. Urakami, and S. Miyamura. 1995. Classification of *Rickettsia tsutsugamushi* in a new genus, *Orientia* gen. Nov., as *Orientia tsutsugamushi* comb. Nov. *Int. J. Syst. Bacteriol.* 45: 589–591.
- Tanskul, P., and K. J. Linthicum. 1997. A new species of *Leptotrombidium* (Acari: Trombiculidae), collected in active rice fields in northern Thailand. *J. Med. Entomol.* 34: 368–371.
- Tanskul, P., and K. J. Linthicum. 1999. Redescription of *Leptotrombidium* (*Leptotrombidium*) *imphalum* (Acari: Trombiculidae), with observations on bionomics and medical importance in northern Thailand. *J. Med. Entomol.* 36: 88–91.
- Tanskul, P., D. Strickman, C. Eamsila, and D. J. Kelly. 1994. *Rickettsia tsutsugamushi* in chiggers (Acari: Trombiculidae) associated with rodents in central Thailand. *J. Med. Entomol.* 31: 225–230.
- Tanskul, P., K. J. Linthicum, P. Watcharapichat, D. Phulsuksombati, S. Mungviriyaa, S. Ratanatham, N. Suwanabun, J. Sattabongkot, and G. Watt. 1998. A new ecology of scrub typhus associated with a foci of antibiotic resistance in rice farmers in Thailand. *J. Med. Entomol.* 35: 551–555.
- Traub R., and C. L. Wisseman, Jr. 1968. Ecological considerations in scrub typhus. 2. Vector species. *Bull. WHO* 39: 219–230.
- Traub R., C. L. Wisseman, Jr., M. R. Jones, and J. J. O'Keefe. 1975. The acquisition of *Rickettsia tsutsugamushi* by chiggers (trombiculid mites) during the feeding process. *Ann. N.Y. Acad. Sci.* 266: 91–114.
- Walker, J. S., C. T. Chan, C. Manikumar, and B. L. Elisberg. 1975. Attempts to infect and demonstrate transovarial transmission of *R. tsutsugamushi* in three species of *Leptotrombidium* mites. *Ann. N.Y. Acad. Sci.* 266: 80–90.
- Watt, G., C. Chouriyagune, R. Ruangweerayud, P. Watcharapichat, D. Phulsuksombati, K. Jongsakul, P. Teja-Isavadharm, D. Bhodhidatta, K. D. Corcoran, G. A. Dasch, and D. Strickman. 1996. Scrub typhus infections poorly responsive to antibiotics in northern Thailand. *Lancet* 348: 86–89.
- Watt, G., P. Kantipong, K. Jongsakul, P. Watcharapichat, and D. Phulsuksombati. 1999. Azithromycin activities against *Orientia tsutsugamushi* strains isolated in cases of scrub typhus in northern Thailand. *Antimicrob. Agents Chemother.* 43: 2817–2818.
- Watt, G., P. Kantipong, K. Jongsakul, P. Watcharapichat, D. Phulsuksombati, and D. Strickman. 2000. Doxycycline and rifampicin for mild scrub-typhus infections in northern Thailand: a randomized trial. *Lancet* 356: 1057–1061.
- Wisseman, C. L. 1991. *Rickettsial infections*, pp. 256–286. G. T. Strickland (ed.), *Hunter's tropical medicine*, 7th ed. Saunders, Philadelphia, PA.

Received for publication 17 August 2001; accepted 9 January 2002.
